# Supplementary material
Source: Springer Nature journal article supplement (https://www.springermedizin.de/resource/supplementary/12991_2012_1329_MOESM3_ESM.pdf/9613726)

■ With psychiatric disorder

□ Without psychiatric disorder

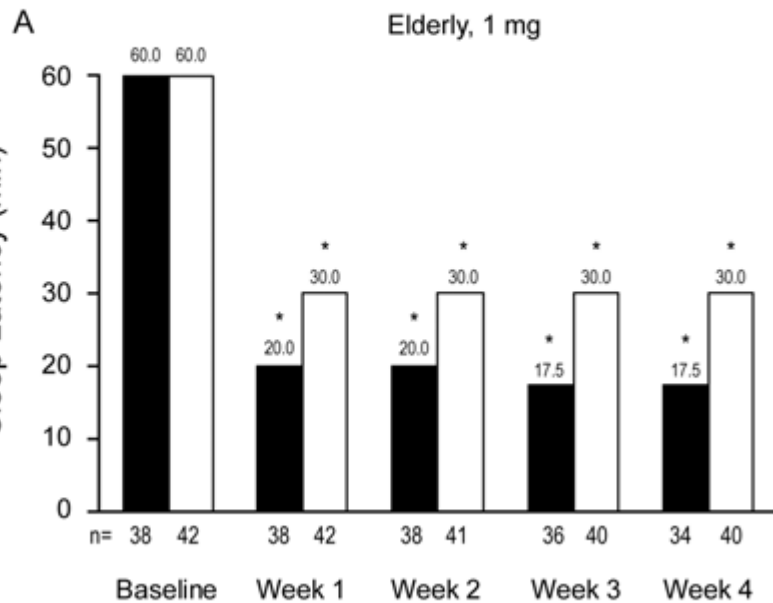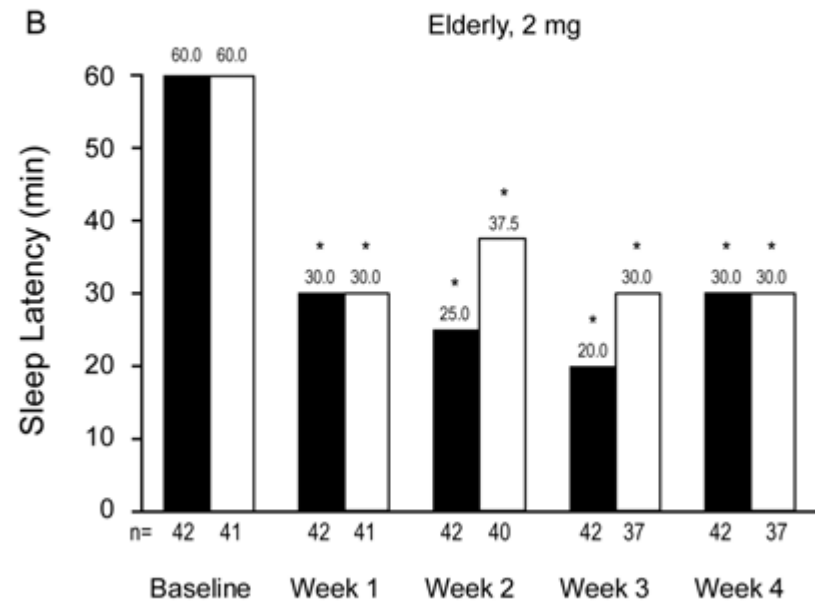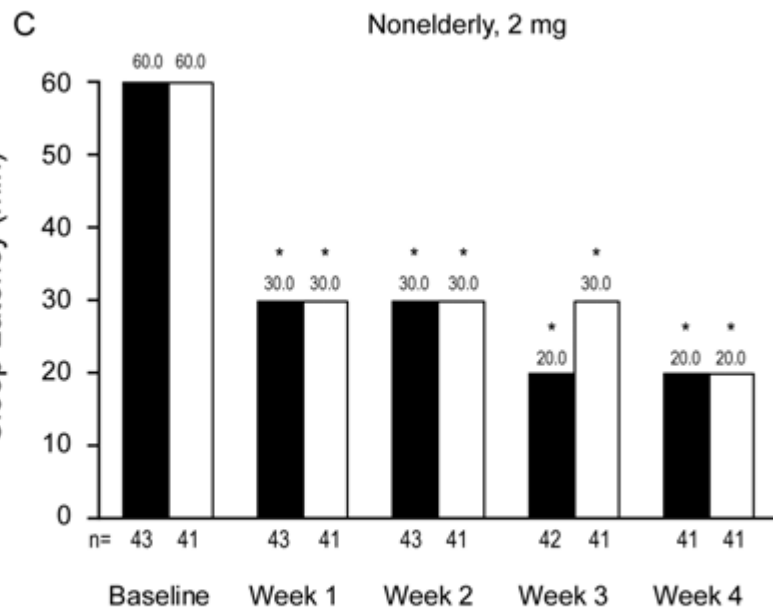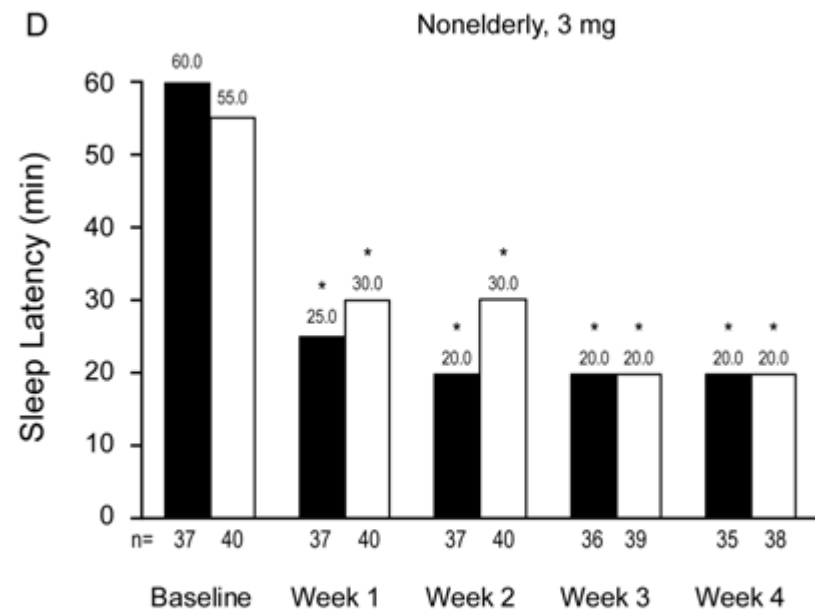

Supplement: MOESM3 [file 9613726]
